# Supplementary material for: Financial strain and depression in the U.S.: a scoping review
Source: Springer Nature journal article supplement (doi:10.1038/s41398-023-02460-z), 2023-05-13
Supplement: MOESM1 [file 41398_2023_2460_MOESM1_ESM.pdf]

## **Appendix A. Search Strategy**

### **Searches conducted through January 19, 2023**

#### **Pubmed search:**

("Depressive Disorder"[Mesh] OR Depression[tw] OR "Psychological Distress"[Mesh] OR psychological distress[tw] OR depress\*[tw] OR Common mood disorder[tw]) AND ("Economic Status"[Mesh] OR wealth[tw] OR savings[tw] OR financial strain[tw] OR debt[tw])

Filters applied: humans; English language

#### **Ebsco search, in Medline, PsycINFO, PsycArticles, SocINDEX, and EconLit:**

(Depression OR depressive OR psychological distress OR depress\* OR Common mood disorder) AND (wealth OR financial strain OR savings OR debt)

Select: Scholarly (Peer Reviewed) Journals; English language; human subject

#### **Embase search:**

#1 'depression'/exp OR depression  
#2 depression OR depressive OR 'psychological distress' OR depress\* OR 'common mood disorder' OR 'psychiatric diagnosis'  
#3 #1 OR #2  
#4 wealth OR 'financial strain' OR savings OR debt  
#5 #3 AND #4  
#6 #3 AND #4 AND ([article]/lim OR [article in press]/lim) AND [english]/lim

Combined

## Appendix B. Articles included in review (n=58)

- Adesogan, O., Lavner, J. A., Carter, S. E., & Beach, S. R. H. (2022). Covid-19 stress and the health of black americans in the rural south. *Clinical Psychological Science*
- Angel, R. J., Frisco, M., Angel, J. L., Chiriboga, D. A. (2003) Financial strain and health among elderly Mexican-origin individuals. *J Health Soc Behav*
- Barton, Allen W., Beach, Steven R. H., Bryant, Chalandra M., Lavner, Justin A., Brody, Gene H. (2018) Stress spillover, African Americans, couple and health outcomes, and the stress-buffering effect of family-centered prevention. *Journal of Family Psychology*
- Bialowolski, P., Weziak-Bialowolska, D., Lee, M. T., Chen, Y., VanderWeele, T. J., & McNeely, E. (2021). The role of financial conditions for physical and mental health. Evidence from a longitudinal survey and insurance claims data. *Social Science & Medicine*
- Buckingham-Howes, S., Holmes, K., Glenn Morris, J., Grattan, Lynn M. (2018) Prolonged financial distress after the Deepwater Horizon oil spill predicts behavioral health. *The Journal of Behavioral Health Services & Research*
- Cao, H., Zhou, N., Li, X., Serido, J., & Shim, S. (2021). Temporal dynamics of the association between financial stress and depressive symptoms throughout the emerging adulthood. *Journal of Affective Disorders*
- Cohen, C. I., Goh, K. H., Gustave, M. (2010) A prospective study of outcome and predictors of subclinical and clinical depression in an older biracial sample of psychiatric outpatients. *J Affect Disord*
- Curran, M. A., Li, X., Barnett, M., Kopystynska, O., Chandler, A. B., & LeBaron, A. B. (2021). Finances, depressive symptoms, destructive conflict, and coparenting among lower-income, unmarried couples: A two-wave, cross-lagged analysis. *Journal of Family Psychology*
- Forbes, M. K. Krueger, R. F. (2019) The Great Recession and mental health in the United States. *Clinical Psychological Science*
- Galatzer-Levy, I. R., Bonanno, G. A. (2012) Beyond normality in the study of bereavement: Heterogeneity in depression outcomes following loss in older adults. *Social Science & Medicine*
- Galtieri, L. R., Fladeboe, K. M., King, K., Friedman, D., Compas, B., Breiger, D., Lengua, L., Keim, M., Boparai, S., & Katz, L. F. (2022). Caregiver perceived financial strain during pediatric cancer treatment: Longitudinal predictors and outcomes. *Health Psychology*
- Gilman, S. E., Bruce, M. L., Ten Have, T., Alexopoulos, G. S., Mulsant, B. H., Reynolds, C. F., 3rd, Cohen, A. (2013) Social inequalities in depression and suicidal ideation among older primary care patients. *Soc Psychiatry Psychiatr Epidemiol*
- Gutierrez, I.A. Park, C.L., Wright, B. R. E. (2017) When the divine defaults: Religious struggle mediates the impact of financial stressors on psychological distress. *Psychology of Religion and Spirituality*
- Hertz-Palmor, N., Moore, T. M., Gothelf, D., DiDomenico, G. E., Dekel, I., Greenberg, D. M., Brown, L. A., Matalon, N., Visoki, E., White, L. K., Himes, M. M., Schwartz-Lifshitz, M., Gross, R., Gur, R. C., Gur, R. E., Pessach, I. M., & Barzilay, R.

- (2021). Association among income loss, financial strain and depressive symptoms during COVID-19: Evidence from two longitudinal studies. *Journal of Affective Disorders*
- Horwitz, A. V., McLaughlin, J., White, H. R. (1998) How the negative and positive aspects of partner relationships affect the mental health of young married people. *Journal of Health and Social Behavior*
- Horwitz, S. M., Briggs-Gowan, M. J. Storfer-Isser, A. Carter, A. S. (2007) Prevalence, correlates, and persistence of maternal depression. *J Womens Health (Larchmt)*
- Jackson, A. P., Bender, P. M., Franke, T. M. (2008) Low-wage maternal employment and parenting style. *Social Work*
- Johnson, A. K., Fulco, C. J., Augustyn, M. B. (2019) Intergenerational continuity in alcohol misuse: Maternal alcohol use disorder and the sequelae of maternal and family functioning. *Psychol Addict Behav*
- Jones, S. M. W., Nguyen, T., & Chennupati, S. (2020). Association of financial burden with self-rated and mental health in older adults with cancer. *Journal of Aging and Health*
- Kasen, S., Cohen, P., Chen, H., Must, A. (2008) Obesity and psychopathology in women: a three decade prospective study. *Int J Obes (Lond)*
- Krause, N. (1987) Chronic strain, locus of control, and distress in older adults. *Psychol Aging*
- Krause, N. and Thompson E (1998). Cognitive functioning, stress, and psychological well-being in later life. *Journal of Mental Health and Aging*
- Krause, N. (2009) Religious involvement, gratitude, and change in depressive symptoms over time. *International Journal for the Psychology of Religion*
- Law, E. F., Zhou, C., Seung, F., Perry, F., & Palermo, T. M. (2021). Longitudinal study of early adaptation to the coronavirus disease pandemic among youth with chronic pain and their parents: Effects of direct exposures and economic stress. *Pain*
- Leonard I. Pearlin, Elizabeth G. Menaghan, Morton A. Lieberman and Joseph T. Mullan (1981) The stress process. *Journal of Health and Social Behavior*
- Lipton, R. (1994) The effect of moderate alcohol use on the relationship between stress and depression. *American Journal of Public Health*
- McCormick, N., Trupin, L., Yelin, E. H., Katz, P. P. (2018) Socioeconomic Predictors of Incident Depression in Systemic Lupus Erythematosus. *Arthritis Care Res (Hoboken)*
- Mendes de Leon, C. F., Rapp, S. S., Kasl, S. V. (1994) Financial strain and symptoms of depression in a community sample of elderly men and women: A longitudinal study. *Journal of Aging and Health*
- Mitchell, A. M., Christian, L. M. (2017) Financial strain and birth weight: the mediating role of psychological distress. *Arch Womens Ment Health*
- Monserud, M. A. (2019) Marital Status and Trajectories of Depressive Symptoms Among Older Adults of Mexican Descent. *Int J Aging Hum Dev*
- Monserud, M. A., Markides, K. S. (2017) Changes in depressive symptoms during widowhood among older Mexican Americans: the role of financial strain, social support, and church attendance. *Aging Ment Health*

- Nam, I. (2016) Financial difficulty effects on depressive symptoms among dementia patient caregivers. *Community Mental Health Journal*
- Neppl, T. K., Senia, J. M., Donnellan, M. B. (2016) Effects of economic hardship: Testing the family stress model over time. *Journal of Family Psychology*
- Newland, R. P., Crnic, K. A., Cox, M. J. Mills-Koonce, W. R. (2013) The family model stress and maternal psychological symptoms: Mediated pathways from economic hardship to parenting. *Journal of Family Psychology*
- Nishtala, M. V., Robbins, S. E., Savage, S., Timsina, L. R., Murphy, P. B., Marka, N. A., Venkatesh, M., & Zarzau, B. L. (2022). Patients follow different financial hardship trajectories in the year after injury. *Annals of Surgery*
- O'Neal, C W., Arnold, A.L., Lucier-Greer, M., Wickrama, K. A. S., Bryant, C. M. (2015) Economic pressure and health and weight management behaviors in African American couples: A family stress perspective. *Journal of Health Psychology*
- Price, R. H., Choi, J. N., Vinokur, A. D. (2002) Links in the chain of adversity following job loss: how financial strain and loss of personal control lead to depression, impaired functioning, and poor health. *J Occup Health Psychol*
- Reisinger, E. L., Dilorio, C. (2009) Individual, seizure-related, and psychosocial predictors of depressive symptoms among people with epilepsy over six months. *Epilepsy Behav*
- Robinson, K.M., Crawford, T. N., Buckwalter, K. (2016) Outcomes of a two-component, evidence-based intervention on depression in dementia caregivers. *Best Practices in Mental Health: An International Journal*
- Russell, D. W., Clavél, F. D. Cutrona, C. E., Abraham, W. T., Burzette, R. G. (2018) Neighborhood racial discrimination and the development of major depression. *J Abnorm Psychol*
- Saasa, S., Ward, K. P., Sandberg, S., & Jacobson, J. (2021). Financial hardship, neighborhood cohesion and child externalizing behaviors: An extension of the family stress model among immigrant mothers. *Children and Youth Services Review*
- Seto, M., Cornelius, M. D., Goldschmidt, L., Morimoto, K., Day, N. L. (2005) Long-term Effects of Chronic Depressive Symptoms Among Low-Income Childrearing Mothers. *Matern Child Health J*
- Shelleby, E. C., Pittman, L. D., Bridgett, D. J., Keane, J., Zolinski, S., & Caradec, J. (2022). Associations between local COVID-19 case rates, pandemic-related financial stress and parent and child functioning. *Journal of Family Psychology*
- Shippee, T. P., Wilkinson, L. R., Schafer, M. H., Shippee, N. D. (2019) Long-Term Effects of Age Discrimination on Mental Health: The Role of Perceived Financial Strain. *J Gerontol B Psychol Sci Soc Sci*
- Strawbridge, W. J., Deleger, S., Roberts, R. E., Kaplan, G. A. (2002) Physical activity reduces the risk of subsequent depression for older adults. *Am J Epidemiol*
- Szanton, S. L., Thorpe Jr, R. J., Gitlin, L. N. (2014) Beat the Blues decreases depression in financially strained older African-American adults. *American Journal of Geriatric Psychiatry*
- Uebelacker, L. A., Eaton, C. B., Weisberg, R., Sands, M., Williams, C., Calhoun, D., Manson, J. E., Denburg, N. L., Taylor, T. (2013) Social support and physical activity as moderators of life stress in predicting baseline depression and change

- in depression over time in the Women's Health Initiative. *Social Psychiatry and Psychiatric Epidemiology: The International Journal for Research in Social and Genetic Epidemiology and Mental Health Services*
- Valentino, S. W., Moore, J. E., Cleveland, M. J., Greenberg, M. T., Tan, X. (2014) Profiles of financial stress over time using subgroup analysis. *Journal of Family and Economic Issues*
- Vinokur, A. D., Price, R. H., Caplan, R. D. (1996) Hard times and hurtful partners: how financial strain affects depression and relationship satisfaction of unemployed persons and their spouses. *J Pers Soc Psychol*
- Vinokur, A. D., Schul, Y. (2002) The web of coping resources and pathways to reemployment following a job loss. *J Occup Health Psychol*
- Vinokur, A. D., Schul, Y. (1997) Mastery and inoculation against setbacks as active ingredients in the JOBS intervention for the unemployed. *J Consult Clin Psychol*
- Wadsworth, M. E., Rindlaub, L., Hurwich-Reiss, E., Rienks, S., Bianco, H., Markman, H. J. (2013) A longitudinal examination of the adaptation to poverty-related stress model: Predicting child and adolescent adjustment over time. *Journal of Clinical Child and Adolescent Psychology*
- West, K. B., Hale, M. E., Roche, K. M., White, R. M. B., & Suveg, C. (2022). Predictors of latent class trajectories of depressive symptoms in Latina mothers. *Journal of Family Psychology*
- Wickrama, K. A. S., Klopach, E. T., & O'Neal, C. W. (2022). Higher-order trajectories of pain and depressive symptoms link midlife financial stress to women's well-being in later life. *Aging & Mental Health*
- Wickrama, K. A. S., & O'Neal, C. W. (2021). Midlife marital and financial stress and the progression of later-life health problems for husbands and wives. *Journal of Aging and Health*
- Wickrama, K. A. S., O'Neal, C.W., Lorenz, F. O. (2018) Marital processes linking economic hardship to mental health: The role of neurotic vulnerability. *Journal of Family Psychology*
- Wilkinson, L. R. (2016) Financial Strain and Mental Health Among Older Adults During the Great Recession. *J Gerontol B Psychol Sci Soc Sci*
- Yoshikawa, H., Godfrey, E. B., Rivera, A. C. (2008) Access to institutional resources as a measure of social exclusion: relations with family process and cognitive development in the context of immigration. *New Dir Child Adolesc Dev*
